# Supplementary material for: Laboratory measurements and model sensitivity studies of dust deposition ice nucleation
Source: Copernicus journal article supplement (doi:10.5194/acp-12-7295-2012), 2012-08-16
Supplement: Supplementary file 1 [file acp-12-7295-2012-supplement.pdf]

**Supplementary information to the following paper:**

Laboratory Measurements and Model Sensitivity Studies of Dust Deposition Ice  
Nucleation

Gourihar Kulkarni, Jiwen Fan, Jennifer M. Comstock, Xiaohong Liu, and Mikhail Ovchinnikov  
Atmospheric Sciences and Global Change Division, Pacific Northwest National Laboratory,  
Richland, WA, 99352, USA

*Correspondence to:* Gourihar Kulkarni  
(Gourihar.Kulkarni@pnnl.gov)

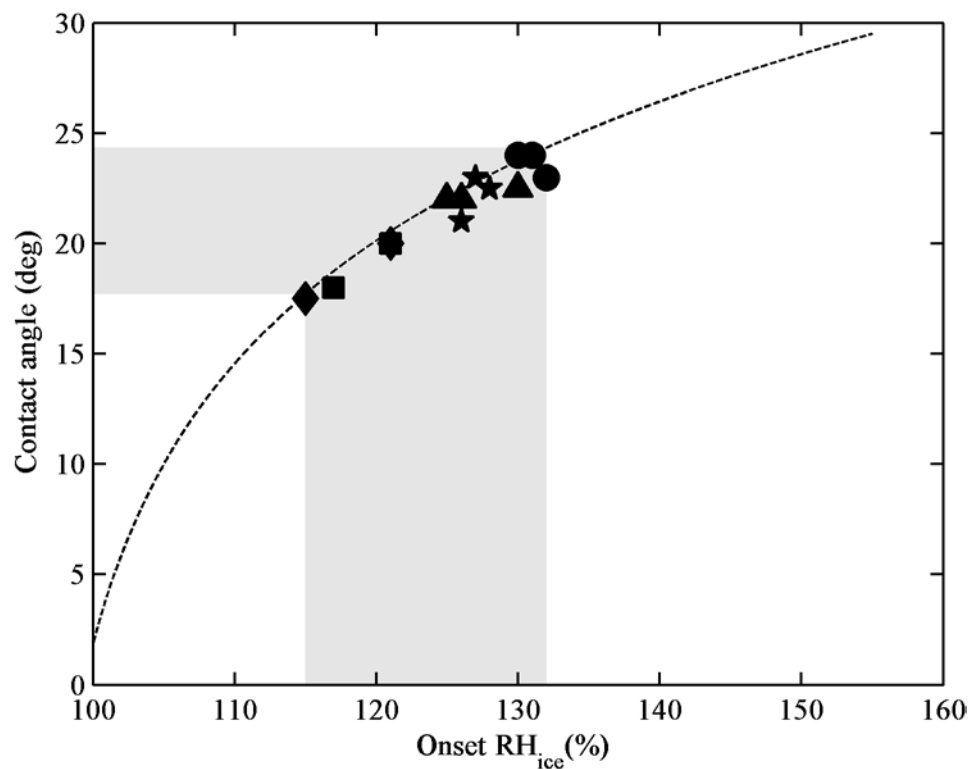

Figure S1: Comparison of onset  $RH_{ice}$  (filled symbols) with the Wang and Knopf (2011) deposition ice nucleation parameterization (dashed line). Marker symbols for 100, 300, 400 and 500 nm size particles are shown as circles, triangles, squares, and diamonds, respectively. See text and Table 1 and 2 for more details.

Reference:

Wang, B. and Knopf, D. A.: Heterogeneous ice nucleation on particles composed of humic-like substances impacted by O<sub>3</sub>, J. Geophys. Res., 116, D03205, 2011
